26 **two complementary mechanisms related to source and sink dynamics. First, the**  
27 **“rescue effect” maintains local biodiversity by rapid recolonization after a local**  
28 **crash in population densities. Second, the “drainage effect” allows a more uniform**  
29 **spreading of biomass across the landscape, reducing overall interaction strengths**  
30 **and therefore stabilizing dynamics. In complex food webs on large spatial networks**  
31 **of habitat patches, these effects yield systematically higher biodiversity in**  
32 **heterogeneous than in homogeneous landscapes. Our meta-food-web approach**  
33 **reveals a strong interaction between habitat fragmentation and eutrophication and**  
34 **provides a mechanistic explanation of how landscape heterogeneity promotes**  
35 **biodiversity.**

36

37 Increasing human demands for production of goods in natural landscapes have caused  
38 habitat fragmentation and homogenisation, eutrophication and increasing land-use  
39 intensity. This resulted in an erosion of biodiversity and associated ecosystem services at  
40 global scales. Habitat fragmentation describes how production areas dissect continuous  
41 natural landscapes into habitat patches embedded in a landscape matrix whose hostility  
42 for the species increases with land-use intensity. Increasing nutrient inputs from  
43 agricultural practices yield biomass accumulations at higher trophic levels, eroding  
44 biodiversity by increased species’ interaction strengths<sup>6,9</sup>. Despite growing evidence on  
45 the importance of these global change factors, we still do not understand how their  
46 interaction drives biodiversity changes. While fragmentation and eutrophication are  
47 often studied in isolation, complex feedback loops in multi-trophic food webs can  
48 generate non-linearities in the response of biodiversity, which is rendering our  
49 knowledge of the interactive effects of these stressors in natural landscapes fraught with  
50 uncertainty. The high-dimensional interplay between spatial and trophic processes

51 prevents experimental studies on such complex interactions. Simulations of spatial food  
52 web dynamics are therefore needed to reveal the mechanisms underlying how these  
53 global change stressors interact.

54 One key challenge is the integration of spatial processes connecting local populations  
55 across habitat patches into metapopulations and interaction processes connecting local  
56 species into complex food webs (Fig. 1). Traditionally, independent and mostly separated  
57 research areas have addressed these two types of ecological networks. First,  
58 metacommunity theory describes how dispersing individuals connect local populations  
59 across complex spatial networks of habitat patches<sup>10</sup>. Depending on their size and quality,  
60 patches can comprise large source populations that yield a net dispersal flux of individuals  
61 to small sink populations<sup>1,4</sup> (Fig. 1a). These source-sink dynamics<sup>11</sup> can facilitate  
62 persistence of small populations by rescue effects<sup>12</sup>, which is undermined by increasing  
63 fragmentation or land-use intensity that prevent successful dispersal. Second, food-web  
64 theory addresses how biomass fluxes (i.e. energy and matter) between species drive  
65 population dynamics (Fig. 1b). Weak biomass fluxes can cause consumer extinction due  
66 to energy limitations while strong biomass fluxes can result in top-heavy consumer-  
67 resource biomass pyramids with unstable dynamics<sup>6,9</sup>. Eutrophication in particular  
68 increases all biomass fluxes and thus undermines biodiversity of local food webs<sup>7</sup>.  
69 Although both research areas documented strongly negative effects of either  
70 fragmentation or eutrophication on biodiversity, the interplay of these stressors in  
71 complex natural communities has remained virtually untapped.

72 So far, studies synthesizing spatial and trophic processes have been limited to small  
73 species motifs such as food chains<sup>13,14</sup>. They showed that dispersal can synchronize  
74 population dynamics, which reduces biodiversity by correlated local extinctions<sup>15,16</sup>.  
75 However, consumer dispersal can also induce compensatory dynamics<sup>17</sup> and dampen

76 oscillations<sup>18</sup>, which prevents extinctions. Moreover, dispersal may increase resilience of  
77 complex food webs by reducing strong interspecific interactions<sup>19</sup> depending on the  
78 trophic level that is dispersing<sup>18</sup>. The relative strength of these potentially counteracting  
79 positive and negative effects of dispersal on population persistence depends on the  
80 trophic interaction structure<sup>14</sup>. While these studies have demonstrated interactions  
81 between spatial and trophic processes in small modules, the study of impacts on  
82 biodiversity in large spatial networks with many species has remained in its infancy.  
83 Traits of organisms play an important role in both spatial and trophic processes. In  
84 metacommunities, body mass and movement mode determine which patches compose  
85 species-specific spatial networks<sup>20</sup>. Similarly, the propagation of energy fluxes through  
86 food webs is driven by species' interaction strengths that depend strongly on body  
87 masses<sup>8</sup>. Although metapopulation and food-web theories have been developed mostly  
88 independently, they have identified the same important drivers (i.e. body mass), and the  
89 same currencies (i.e. biomass fluxes). To date, a trophic metacommunity framework  
90 incorporating spatial use properties is still lacking<sup>21</sup>. Also, as spatial and trophic processes  
91 in real landscapes are coupled (Fig. 1c), a mechanistic understanding of global change  
92 effects on ecosystems will benefit from an integrated approach. We address this challenge  
93 by synthesizing metapopulation and food-web models that use allometric scaling  
94 relationships of spatial and trophic processes as a unifying principle into a meta-food-web  
95 model. We identify key mechanisms complementary to the rescue effect in landscapes  
96 under eutrophication and isolation (Fig. 1).

97

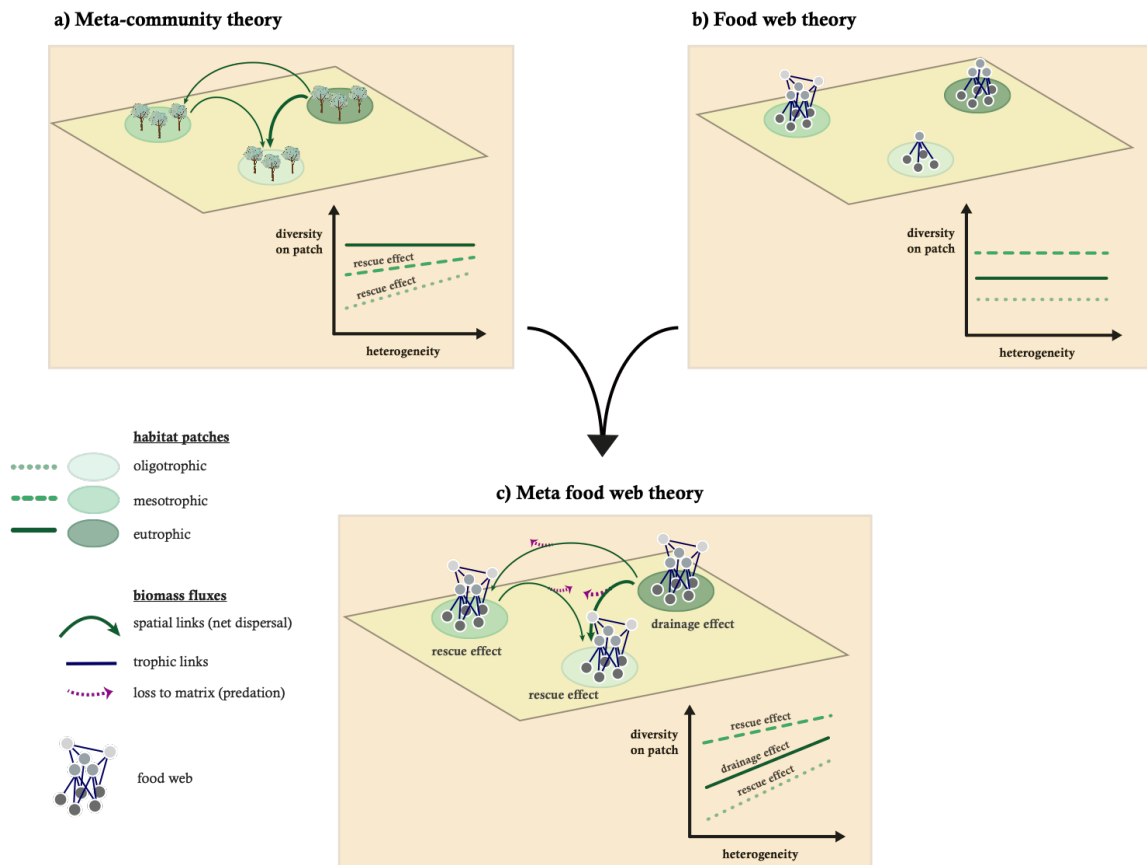

98

99 **Fig. 1. Conceptual figure illustrating the synthesis of metacommunity theory and food-web theory**

100 **into meta-food-web theory.** Panel a) illustrates metacommunity dynamics with net dispersal from larger  
101 (nutrient richer patches) to smaller populations (nutrient poorer patches) and the associated rescue effect  
102 on local diversity. Panel b) illustrates local food-web dynamics on patches with different nutrient richness  
103 and the effect of the paradox of enrichment on local diversity. Panel c) illustrates the synthesis of  
104 metacommunity and food web dynamics and the interaction of respective key effects and their consequence  
105 for biodiversity.

106

107 We use a bioenergetic model to analyse population dynamics across a gradient of  
108 complexity from simple (tri-trophic food chain on a single patch) to complex systems (40-  
109 species food web on 50 habitat patches). This model employs body masses as the unifying  
110 trait that determines not only trophic links and interaction strengths of the food webs but  
111 also the dispersal ranges. Dispersal rates depend on local net growth rates, summarizing

112 resource availability, competition and predator pressure arising from local trophic  
113 dynamics<sup>22</sup>.

114

115 Firstly, on a single patch, low nutrient supply for a tri-trophic food chain causes predator  
116 starvation (Fig. 2a, extinction, left side). Increasing nutrient supply first promotes  
117 predator equilibrium biomass densities (Fig. 2a, survival, equilibrium) and therefore top-  
118 heavy biomass pyramids causing biomass oscillations (Fig. 2a, survival, oscillation), which  
119 paradoxically eventually yield predator extinction (Fig. 2a, extinction, right side). Such  
120 extinctions due to unstable oscillations under eutrophication have first been described as  
121 the “paradox of enrichment”<sup>6</sup>. Subsequently, they were generalized to systems with an  
122 increased energy flux to the predator relative to its loss rate<sup>9,23</sup>. Turning around this  
123 “principle of energy flux”, however, also suggests that an additional drainage effect arises  
124 from energy transfer from large populations (sources) to small populations (sinks),  
125 preventing unstable dynamics in top-heavy systems. Consistent with this hypothesis, we  
126 find that increasing emigration rates that drain biomass out of a eutrophic location can  
127 prevent predator extinction by reducing oscillations (Fig. 2b). Spatial fluxes tend to  
128 increase with dispersal rates and the underlying variability in the landscape. This  
129 demonstrates the drainage effect as a mechanism by which spatial processes can stabilize  
130 trophic population dynamics in heterogeneous landscapes.

131

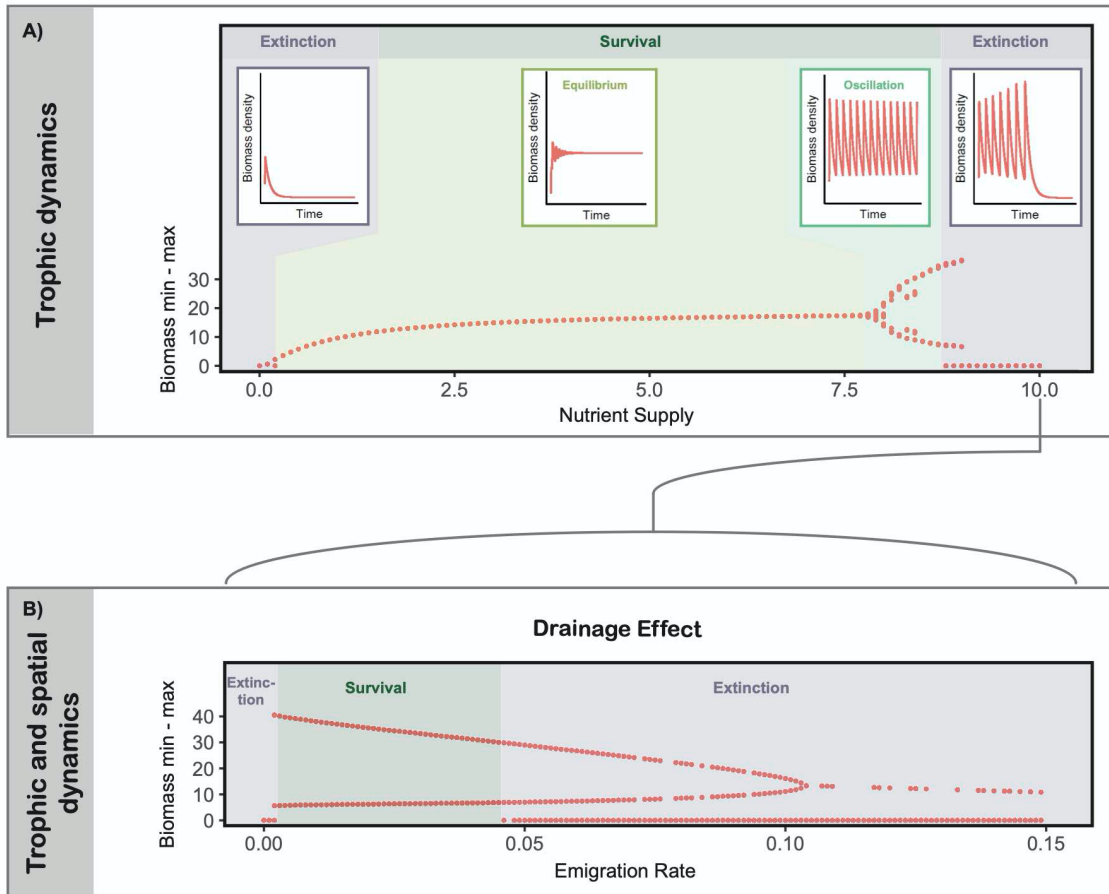

132

133

134 **Fig. 2: Top predator dynamics of a tri-trophic food chain on a single patch.** A) Exemplary time series of  
135 biomass densities of the predator at different nutrient supply concentrations (boxes; from left to right: 0.1  
136 (oligotrophic); 3 (mesotrophic); 8.5 and 10 (eutrophic)) corresponding to points in the bifurcation diagram  
137 showing maximum and minimum biomass density (y-axis) across a gradient of nutrient supply  
138 concentrations (x-axis). B) Bifurcation diagram showing maximum and minimum biomass density (y-axis)  
139 when enabling emigration across a gradient of emigration rates (x-axis) with a nutrient supply  
140 concentration of 10, which corresponds to the last point in panel A).

141

142 Subsequently, we studied this drainage effect in systems of two connected habitats across  
143 gradients of landscape hostility and habitat heterogeneity (represented by the difference  
144 in nutrient supply concentration of the two locations). Landscape hostility summarizes all  
145 factors that drive the loss of biomass during dispersal including higher metabolic costs

146 and increased mortality rates by predation pressure in the unsuitable landscape matrix.  
147 Dispersal synchronizes unstable dynamics, causing predator extinction (Fig. 3, lower left  
148 corner), in simulations without heterogeneity and without hostility. Increasing landscape  
149 hostility yields drainage of biomass during dispersal, facilitates predator persistence and  
150 then also reduces oscillations (Fig. 3, along the hostility axis). At very high levels of  
151 landscape hostility, however, extreme death rates during dispersal cause predator  
152 extinction. Similarly, increasing patch heterogeneity also enables predator persistence  
153 and decreases oscillations (Fig. 3, along the heterogeneity axis). The drainage effect offers  
154 general mechanistic explanations for these emergent patterns despite of some slightly  
155 more complex patterns in population oscillations (e.g. some combinations of landscape  
156 hostility and patch heterogeneity yield weak spatial links between patches and  
157 desynchronization of biomass oscillation frequencies, see Supplement Fig. S2 for details).  
158 For eutrophic patches, increased dispersal losses by landscape hostility or the coupling  
159 with an oligotrophic patch (patch heterogeneity) both increase the biomass drainage  
160 through increased net migration. For oligotrophic patches, however, there are differences  
161 between effects of landscape hostility and patch heterogeneity. Drainage by landscape  
162 hostility suppresses small populations even more, whereas patch heterogeneity causes a  
163 gain in biomass via dispersal that supports predator populations via rescue effects (see  
164 Supplement Fig. S1). Patch heterogeneity thus creates dispersal fluxes in biomass that are  
165 responsible for not only the well-known rescue effects<sup>12</sup> supporting small populations on  
166 oligotrophic sink patches by net-immigration but also the drainage effects sustaining  
167 large populations on eutrophic patches.



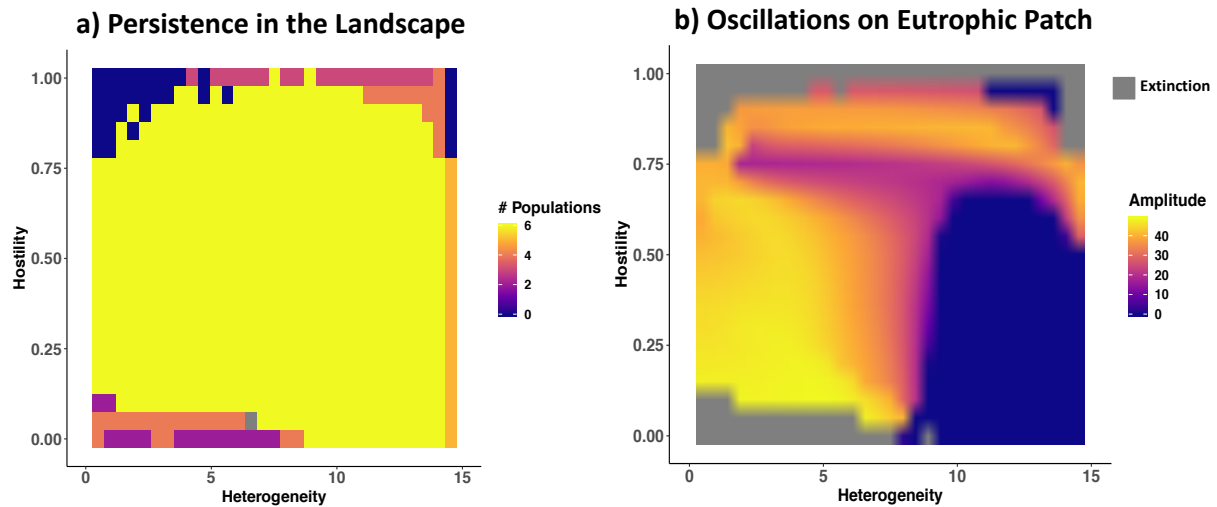

168

169 **Fig. 3: Top predator dynamics of a tri-trophic food chain on two coupled patches.** a) Heat map showing  
170 the number of persisting populations (colour coded; plant, herbivore and predator on 2 patches; maximum  
171 of 6) in the landscape across gradients of landscape heterogeneity (x-axis; difference in nutrient supply  
172 concentration across the two patches; on the left: two eutrophic patches, on the right: an eutrophic and an  
173 oligotrophic patch) and matrix hostility (y-axis). b) Heat map showing the amplitude of biomass density  
174 oscillations of the predator (z-axis; colour coded) in the (always) eutrophic patch across gradients of  
175 landscape heterogeneity (x-axis; difference in nutrient supply concentration between the two patches) and  
176 matrix hostility (y-axis). Amplitudes of 0 (blue) stand for an equilibrium state of the predator. Grey areas  
177 are where the predator went extinct.

178

179 To generalize the mechanistic understanding of drainage effects from food chains, we  
180 simulated the dynamics of a complex food web consisting of 10 plants and 30 animals on  
181 different complex landscapes containing 50 habitat patches (Fig. 4). We simulated  
182 homogeneous landscapes, where all patches have the same nutrient supply concentration.

183 These simulations were replicated across a gradient of nutrient supply concentrations  
184 ranging from  $10^{-0.8}$  (oligotrophic) to  $10^2$  (eutrophic). We also simulated three types of  
185 heterogeneous landscapes with landscape averages being oligotrophic, mesotrophic or  
186 eutrophic (Fig. 4). Nutrient supply concentration for each patch of heterogeneous  
187 landscapes is assigned randomly from the same gradient as in the homogeneous scenario,  
188 but with a higher sampling density in the lower or higher nutrient supply values for  
189 oligotrophic and eutrophic heterogeneous landscapes, respectively, and uniform  
190 sampling for the mesotrophic heterogeneous landscapes. In line with our results from the  
191 food chain simulations, we found that local species richness in homogeneous landscapes  
192 is lowest on oligotrophic patches due to energy limitation. Higher nutrient supply first  
193 increases species richness on mesotrophic patches before decreasing it again on  
194 eutrophic patches (Fig. 4, purple). Species richness is highest in mesotrophic  
195 heterogeneous landscapes because oligotrophic patches profit from the rescue effect and  
196 eutrophic patches profit from the drainage effect (Fig. 4, orange). If there are only a few  
197 oligotrophic patches in a eutrophic heterogeneous landscape, rescue and drainage effects  
198 still increase local diversity, although the rescue effect is weaker (Fig. 4, blue). Similarly, a  
199 few eutrophic patches in an oligotrophic landscape foster local diversity through rescue  
200 and drainage effects (Fig. 4, green). Thus, rescue effects and drainage effects also apply to  
201 complex food webs in complex landscapes. This shows that the interaction of strong and  
202 weak spatial and trophic biomass fluxes increases stability and species richness in  
203 metacommunities.

204

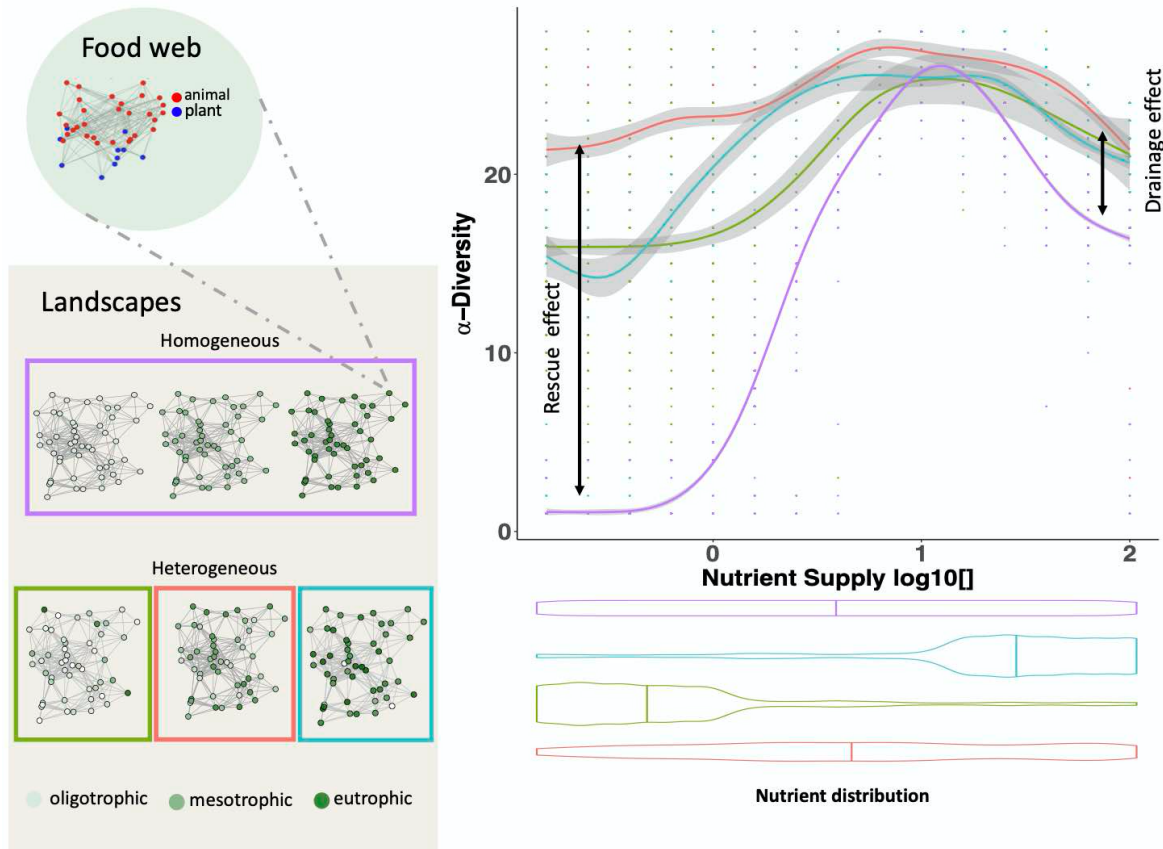

205

206 **Fig. 4 Landscape heterogeneity drives biodiversity in complex meta-food-webs.** Local diversity (y-  
207 axis) across a gradient of patch nutrient supply concentration in homogeneous (purple) and heterogeneous  
208 (green, orange, blue) landscapes. Violin plots below the x-axis show nutrient distributions within the  
209 landscape for each scenario. The meta-food-web consists of a complex food web of 10 plants and 30 animals  
210 and large homogeneous and heterogeneous landscapes with 50 habitat patches with different patch  
211 nutrient supply concentrations (nutrient supply concentrations on habitat patches are colour coded). Edges  
212 indicate dispersal links for an exemplary species with a dispersal range of 0.3. Lines are a smooth fit from  
213 a GAM model with 95% confidence intervals in ggplot2 and points represent the data.

214

215 Spatial processes in heterogenous landscapes stabilise local food-web dynamics and  
216 translate into higher diversity. This stresses the importance of addressing global change  
217 drivers in a meta-food-web framework. Various mechanisms are involved, all related to  
218 source-sink dynamics where energy moves from high biomass locations to low biomass  
219 locations. We have found that the well-known rescue effect allows persistence on

220 oligotrophic patches, while the novel drainage effect buffers eutrophic patches. Complex  
221 interactions among these phenomena may further promote diversity. For instance,  
222 nutrient spillover from a eutrophic to a neighbouring oligotrophic location may promote  
223 local productivity and increase food-chain length<sup>24</sup>. Such spatial nutrient diffusion can  
224 destabilize simple food chains and decrease spatial heterogeneity in a meta-ecosystem  
225 model<sup>18</sup> and thus cross-ecosystem nutrient fluxes can change community composition<sup>25</sup>.  
226 These meta-ecosystem approaches have synthesized nutrient fluxes with simple trophic  
227 modules, and our meta-food-web approach provides a flexible tool to scale-up these  
228 findings to the levels of landscape and food-web complexity that characterize natural  
229 ecosystems.

230

231 In real landscapes, which suffer more and more from fragmentation, land-use  
232 intensification and eutrophication due to human activities, managing connectivity and  
233 heterogeneity is an important aspect of biodiversity conservation and restoration.  
234 Traditionally, increasing landscape hostility due to higher dispersal mortality or  
235 increased distances between habitat fragments have been perceived as threats to the  
236 biodiversity of habitat patches as they reduce rescue effects<sup>12</sup>. Hence, wildlife bridges  
237 across highways and other corridors to increase connectivity between habitat patches  
238 have been propagated as important tools to remedy the consequences of land-use  
239 intensification as the reduced hostility may benefit small sink populations by rescue  
240 effects and thus lower extinction risks<sup>26</sup>. Our results, however, indicate that the  
241 consequences of increasing habitat connectivity are highly context-dependent. We found  
242 that higher connectivity between large populations can undermine biodiversity by  
243 decreasing the drainage effect, whereas connecting large and small populations is  
244 generally beneficial for both. Thus, in managing landscape connectivity, connections

245 between eutrophic and oligotrophic habitats or among oligotrophic habitats should be  
246 enhanced to reduce the hostility effect. However, connections among eutrophic habitats  
247 should only be established with caution, as a reduced hostility effect results in less  
248 drainage effect and thus has the potential do destabilize both populations.

249 Broader implications for ecosystem services can arise as two habitat patches that suffer  
250 from eutrophication may lose predatory pest control agents if they are well connected to  
251 each other but may maintain pest control when coupled with less intensive or natural  
252 habitats. Thus, the management of connectivity and heterogeneity in landscapes suffering  
253 from fragmentation and eutrophication may benefit from fostering rescue and drainage  
254 effects to maintain biodiversity and ecosystem services. Our meta-food-web approach has  
255 revealed interactions between spatial and trophic dynamics beyond the rescue effect that  
256 provide a mechanistic explanation of how landscape heterogeneity enhances biodiversity,  
257 which facilitates new strategies for active landscape management to foster natural  
258 biodiversity and ecosystem services.

259

## 260 **Author contributions**

261 R.R., U.B. and M.R.H. developed the idea, R.R. built the model, did the analyses and wrote  
262 the first draft of the manuscript. M.R.H. designed the figures. All authors contributed to  
263 the interpretation and the final version of this manuscript.

264

## 265 **Acknowledgements**

266 We gratefully acknowledge the support of the German Centre for Integrative Biodiversity  
267 Research (iDiv) Halle-Jena-Leipzig funded by the German Research Foundation (FZT 118)  
268 and funding by the German Research Foundation (DFG) in the framework of the research  
269 units FOR 1748 (BR 2315/16-2) and FOR 2716 (BR 2315/21-1).

270

## 271 **Competing interests**

272 None declared.

273

## 274 **Materials and Correspondence**

275 Requests should be addressed to U.B.

276

## 277 **Methods summary**

### 278 **Model**

279 We model a tritrophic food chain of one plant, one herbivore and one predator population  
280 on one or two habitat patches and complex meta-food-webs consisting of 10 plants and  
281 30 animals in different landscapes containing 50 patches. The feeding dynamics are  
282 constant over all patches and are determined by the allometric food-web model by  
283 Schneider et al. 2016<sup>27</sup>. We integrate dispersal as species-specific biomass flux between  
284 habitat patches according to Ryser et al. 2019<sup>28</sup>. With the use of a dynamic bioenergetic  
285 model we formulate feeding and dispersal dynamics in terms of ordinary differential  
286 equations. The rate of change in biomass densities of a species are the sum of its biomass  
287 loss by metabolism, being preyed upon and emigration and its biomass gain by feeding  
288 and immigration. For detailed equations see Ryser et al. 2019<sup>28</sup> and for model parameters  
289 see the supplement (TS1).

### 290 **Local food-web dynamics**

291 Following the allometric food-web model by Schneider et al. 2016<sup>27</sup> each species is fully  
292 characterised by its average adult body mass. For the complex food web  $\log_{10}$  body masses  
293 were randomly drawn from a uniform distribution from 0 to 3 for plants and from 2 to 6  
294 for animals. For the food chain the plant body mass was set to  $10^2$ , the herbivore body

295 mass to  $10^4$  and the predator body mass to  $10^6$ . We set mass ratios of the herbivore to the  
296 plant and the predator to the herbivore to the optimum of 100, thus the respective  
297 resource being a one-hundredth of its consumer's body mass. Trophic dynamical  
298 parameters, such as metabolic rates and feeding rates, scale with body masses of model  
299 species. Also, we assume a type II functional response. Capture rates were reduced to 5%  
300 to achieve viable food chains and food webs with no interference competition.

### 301 **Nutrient model**

302 We have an underlying nutrient model with one nutrient that is driving the nutrient  
303 uptake and therefore the growth rate of the plant population<sup>8,27</sup>. The nutrient model  
304 consists of one nutrient, a nutrient turnover rate of 0.25 and a nutrient supply  
305 concentration. The nutrient supply concentration was varied to get eutrophic and  
306 oligotrophic patches (see Setup).

### 307 **Spatial dynamics**

308 We model dispersal between local communities as a dynamic process of emigration and  
309 immigration, assuming dispersal to occur at the same timescale as the local population  
310 dynamics<sup>29</sup>. Thus, biomass flows change dynamically between local populations and the  
311 dispersal dynamics directly influence local population dynamics and vice versa<sup>22</sup>.

312 Dispersal rates of animals are modelled with an adaptive emigration rate depending on  
313 the net growth rate on the given patch. Dispersal ranges depend on the body masses of  
314 our model species with larger species having a higher dispersal range. We model a hostile  
315 matrix between habitat patches that does not allow feeding interactions to occur during  
316 dispersal. Depending on the scenario, we define a landscape with one or two patches. In  
317 cases with two patches, their locations are spatially explicit and were chosen in a way that  
318 the distances between reflect the dispersal loss of the predator across the matrix hostility  
319 gradient.

## 320 **Emigration and immigration**

321 Based on empirical observations<sup>30</sup> and previous theoretical frameworks<sup>13,20,31</sup>, we  
322 assume that the maximum dispersal distance of animal species increases with their body  
323 mass. For simplicity, we do not let the plants disperse, as they don't move themselves and  
324 the dispersal of plant propagules strongly depends on their dispersal strategy. We model  
325 emigration rates as a function of each species' per capita net growth rate, which is  
326 summarising local conditions such as resource availability, predation pressure, and inter-  
327 and intraspecific competition<sup>22</sup>. Dispersal losses scale linearly with the distance between  
328 two patches and are 100% in scenarios with only one patch or when the distance between  
329 the two patches surpasses the dispersal range of an animal. Even though we model  
330 dispersal losses according to dispersal distances, this loss term could also represent any  
331 other sort of dispersal loss. For numerical reasons, we did not allow dispersal flows  
332 smaller than  $10^{-10}$ .

## 333 **Numerical simulations**

334 We initialised each local population with a biomass density randomly sampled from a  
335 uniform probability density within the interval (0,10). Starting from these random initial  
336 conditions, we numerically simulated food web and dispersal dynamics over 100,000  
337 time steps by integrating the system of differential equations implemented in C++ using  
338 procedures of the SUNDIALS CVODE solver version 2.7.0 (backward differentiation  
339 formula with absolute and relative error tolerances of  $10^{-10}$ ) and the time series of  
340 biomass densities were saved for last 10,000 time steps. For numerical reasons, a local  
341 population was considered extinct and was set to 0 once its biomass density dropped  
342 below  $10^{-20}$ .

## 343 **Equations and parameters**



344 For detailed equations and parameters, see Ryser et al. 2019<sup>28</sup> and the Supplementary  
345 Material.

### 346 **Setup**

347 To answer our questions, we model the following scenarios:

348 *Nutrient enrichment*: Simulations across a gradient of nutrient supply concentrations (0,  
349 10) on one patch without emigration and therefore also no dispersal loss.

350 *Drainage effect*: Simulations across a gradient of maximal emigration rates (0, 0.15) on  
351 one eutrophic patch with a nutrient supply concentration of 10.

352 *Hostility effect with two patches*: Simulations across a gradient of dispersal losses (0, 1) on  
353 two eutrophic patches with a nutrient supply concentration of 15 on each and a maximal  
354 dispersal rate of 0.05.

355 *Heterogeneity effect with two patches*: Simulations across a gradient of nutrient supply  
356 concentrations (0, 15) on one of two patches with the other patch being a eutrophic patch  
357 with a nutrient supply concentration of 15, a maximal emigration rate of 0.05 and no  
358 dispersal loss.

359 *Interaction of hostility effect and heterogeneity effect*: For each level of heterogeneity  
360 (difference in nutrient supply between the two patches) we simulated the whole gradient  
361 of the hostility effect (dispersal loss of the predator from 0 to 1).

362 *Heterogeneity effect on complex food webs in complex landscapes*: For a complex meta-  
363 food-web, we generated 5 random geometric graphs consisting of 50 patches. Each patch  
364 was initialised with a complex food web consisting of 10 plant and 30 animal species. For  
365 all random geometric graphs, we simulated 15 homogeneous landscapes, where all  
366 patches have the same nutrient supply concentration with simulations across a gradient  
367 of nutrient supply concentrations ranging from  $10^{-0.8}$  (oligotrophic) to  $10^2$  (eutrophic) in  
368 steps of 0.2 in the exponent, and 5 heterogeneous landscapes, where the nutrient supply

369 concentration for each patch is assigned randomly from the same gradient as in the  
370 homogeneous scenario.

371

## 372 **Reference**

373

- 374 1. Hansson, L. Dispersal and connectivity in metapopulations. *Biol. J. Linn. Soc.* **42**, 89–103  
375 (1991).
- 376 2. Hanski, I. Metapopulation dynamics. *Nature* **396**, 41 (1998).
- 377 3. Loreau, M. & Mouquet, N. Immigration and the Maintenance of Local Species Diversity.  
378 *Am. Nat.* **154**, 427–440 (1999).
- 379 4. Hanski, I. & Ovaskainen, O. The metapopulation capacity of a fragmented landscape.  
380 *Nature* **404**, 755–758 (2000).
- 381 5. Mouquet, N. & Loreau, M. Community Patterns in Source-Sink Metacommunities. *Am.*  
382 *Nat.* **162**, 544–557 (2003).
- 383 6. Rosenzweig, M. L. Paradox of Enrichment: Destabilization of Exploitation Ecosystems in  
384 Ecological Time. *Science* **171**, 385–387 (1971).
- 385 7. Rall, B. C., Guill, C. & Brose, U. Food-web connectance and predator interference dampen  
386 the paradox of enrichment. *Oikos* **117**, 202–213 (2008).
- 387 8. Brose, U. *et al.* Foraging theory predicts predator–prey energy fluxes. *J. Anim. Ecol.* **77**,  
388 1072–1078 (2008).
- 389 9. Rip, J. M. K. & McCann, K. S. Cross-ecosystem differences in stability and the principle  
390 of energy flux. *Ecol. Lett.* **14**, 733–740 (2011).
- 391 10. Altermatt, F. Diversity in riverine metacommunities: a network perspective. *Aquat. Ecol.*  
392 **47**, 365–377 (2013).
- 393 11. Pulliam, H. R. Sources, Sinks, and Population Regulation. *Am. Nat.* **132**, 652–661 (1988).

- 394 12. Brown, J. H. & Kodric-Brown, A. Turnover Rates in Insular Biogeography: Effect of  
395 Immigration on Extinction. *Ecology* **58**, 445–449 (1977).
- 396 13. Holt, R. D. Food webs in space: On the interplay of dynamic instability and spatial  
397 processes. *Ecol. Res.* **17**, 261–273 (2002).
- 398 14. Koelle, K. & Vandermeer, J. Dispersal-induced desynchronization: from metapopulations  
399 to metacommunities. *Ecol. Lett.* **8**, 167–175 (2005).
- 400 15. Blasius, B., Huppert, A. & Stone, L. Complex dynamics and phase synchronization in  
401 spatially extended ecological systems. *Nature* **399**, 354–359 (1999).
- 402 16. Gouhier, T. C., Guichard, F. & Gonzalez, A. Synchrony and Stability of Food Webs in  
403 Metacommunities. *Am. Nat.* **175**, E16–E34 (2010).
- 404 17. McCann, K. S., Rasmussen, J. B. & Ulanowicz, R. E. The dynamics of spatially coupled  
405 food webs. *Ecol. Lett.* **8**, 513–523 (2005).
- 406 18. Gounand, I. *et al.* The Paradox of Enrichment in Metaecosystems. *Am. Nat.* **184**, 752–763  
407 (2014).
- 408 19. Gravel, D., Massol, F. & Leibold, M. A. Stability and complexity in model meta-  
409 ecosystems. *Nat. Commun.* **7**, 12457 (2016).
- 410 20. Hirt, M. R. *et al.* Bridging Scales: Allometric Random Walks Link Movement and  
411 Biodiversity Research. *Trends Ecol. Evol.* **33**, 701–712 (2018).
- 412 21. Guzman, L. M. *et al.* Towards a multi-trophic extension of metacommunity ecology. *Ecol.*  
413 *Lett.* **22**, 19–33 (2019).
- 414 22. Fronhofer, E. A. *et al.* Bottom-up and top-down control of dispersal across major  
415 organismal groups. *Nat. Ecol. Evol.* **2**, 1859–1863 (2018).
- 416 23. Gellner, G. & McCann, K. S. Consistent role of weak and strong interactions in high- and  
417 low-diversity trophic food webs. *Nat. Commun.* **7**, 1–7 (2016).
- 418 24. Gravel, D., Guichard, F., Loreau, M. & Mouquet, N. Source and sink dynamics in meta-  
419 ecosystems. *Ecology* **91**, 2172–2184 (2010).

- 420 25. Harvey, E., Gounand, I., Fronhofer, E. A. & Altermatt, F. Metaecosystem dynamics drive  
421 community composition in experimental, multi-layered spatial networks. *Oikos* **129**, 402–  
422 412 (2020).
- 423 26. Taylor, B. D. & Goldingay, R. L. Roads and wildlife: impacts, mitigation and implications  
424 for wildlife management in Australia. *Wildl. Res.* **37**, 320–331 (2010).
- 425 27. Schneider, F. D., Brose, U., Rall, B. C. & Guill, C. Animal diversity and ecosystem  
426 functioning in dynamic food webs. *Nat. Commun.* **7**, 1–8 (2016).
- 427 28. Ryser, R. *et al.* The biggest losers: habitat isolation deconstructs complex food webs from  
428 top to bottom. *Proc. R. Soc. B Biol. Sci.* **286**, 20191177 (2019).
- 429 29. Amarasekare, P. Spatial Dynamics of Foodwebs. *Annu. Rev. Ecol. Evol. Syst.* **39**, 479–500  
430 (2008).
- 431 30. Jenkins, D. G. *et al.* Does size matter for dispersal distance? *Glob. Ecol. Biogeogr.* **16**, 415–  
432 425 (2007).
- 433 31. Jetz, W. The Scaling of Animal Space Use. *Science* **306**, 266–268 (2004).
- 434
- 435
